# Supplementary material for: Polyyne-Enriched Extract from Oplopanax elatus Significantly Ameliorates the Progression of Colon Carcinogenesis in ApcMin/+ Mice
Source: MDPI journal article supplement (doi:10.3390/molecules22101593), 2017-09-22
Supplement: s1 [file s1]

Supplementary Materials: Polyene-enriched extract from *Oplopanax elatus* significantly ameliorates the progression of colon carcinogenesis in *Apc*<sup>Min/+</sup> mice.

## SI1. Results

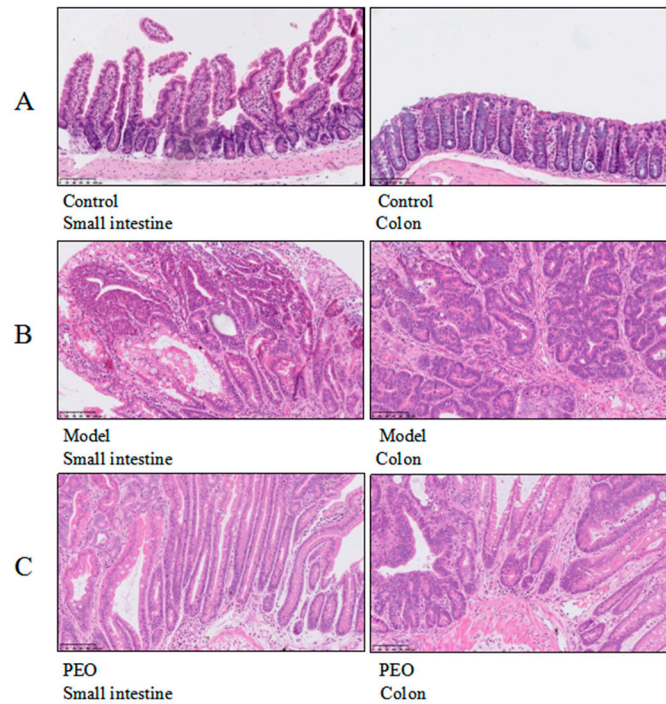

**Figure S1.** The hematoxylin and eosin staining of the small intestine and colon histological sections, bar = 100 μm (20 μm×5). (A) Normol group, (B) Model group, (C) PEO (0.2% diet) group. Samples were scanned by Nano Zoomer 2.0 HT and pictures were obtained from NDP. view 2 (Hamamatsu Photonics K.K., Hamamatsu, Japan).

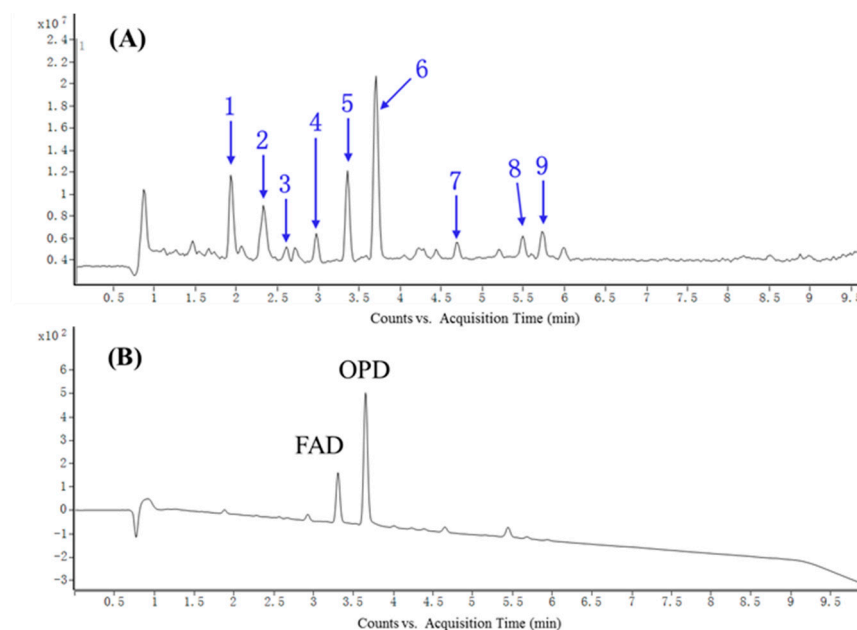

**Figure S2.** (A) Typical total ion chromatograms of PEO by UPLC-QTOF; (B) UPLC chromatogram of PEO extract recorded at 203nm .

**Table S1.** Compounds identified in PEO extract UPLC-QTOF-MS analysis in positive ion mode.

| NO. | RT(min) | [M+H] <sup>+</sup> m/z | Compound                                        | formular | Error(ppm) | MS <sup>2</sup> date                                                                                               | Identification (Ref)                    |
|-----|---------|------------------------|-------------------------------------------------|----------|------------|--------------------------------------------------------------------------------------------------------------------|-----------------------------------------|
| 1   | 1.981   | 415.2122               | C <sub>24</sub> H <sub>30</sub> O <sub>6</sub>  |          | -1.33      | 397.2003, 295.1164, 281.1388, 135.0808, 119.0869, 147.0644, 91.0542, 81.0333, 69.0332, 57.0340                     | Unidentified                            |
| 2   | 2.262   | 274.2743               | C <sub>16</sub> H <sub>35</sub> NO <sub>2</sub> |          | -0.65      | 256.2632, 121.0277, 106.0861, 88.0754, 70.0654, 57.0701                                                            | Unidentified                            |
| 3   | 2.627   | 259.1689               | C <sub>17</sub> H <sub>22</sub> O <sub>2</sub>  |          | 1.66       | 231.1366, 203.1434, 175.0671, 161.0596, 147.0425, 133.0644, 119.0491, 105.0333, 91.0537, 77.0387, 55.0179          | Isofalcariindiolone <a href="#">[1]</a> |
| 4   | 2.992   | 275.1636               | C <sub>17</sub> H <sub>22</sub> O <sub>3</sub>  |          | 1.72       | 257.1519, 219.1368, 191.0695, 145.0642, 127.0378, 91.0542, 79.0539, 67.0542, 55.0543                               | Unidentified                            |
| 5   | 3.389   | 225.1637               | C <sub>17</sub> H <sub>20</sub>                 |          | -0.29      | 197.1318, 183.1164, 169.1012, 155.0851, 141.0696, 129.0695, 115.0538, 105.0699, 91.0536, 79.0542, 67.0545, 55.0545 | Falcariindiol <a href="#">[2]</a>       |
| 6   | 3.654   | 227.1795               | C <sub>17</sub> H <sub>22</sub>                 |          | -0.01      | 199.1475, 185.1324, 171.1166, 157.1011, 143.0853, 129.0697, 115.0538, 105.0697, 91.0542, 79.0542, 67.0542, 55.0545 | Oplopandiol <a href="#">[2]</a>         |
| 7   | 4.698   | 318.2066               | C <sub>19</sub> H <sub>27</sub> NO <sub>3</sub> |          | -0.46      | 276.1941, 191.0692, 135.0439, 107.0485, 77.0386                                                                    | Unidentified                            |
| 8   | 5.477   | 243.1745               | C <sub>17</sub> H <sub>22</sub> O               |          | 0.48       | 225.1636, 173.0954, 157.0646, 145.1007, 131.0849, 117.0694, 105.0702, 91.0540, 67.0536, 57.0335                    | Unidentified                            |
| 9   | 5.693   | 261.1846               | C <sub>17</sub> H <sub>24</sub> O <sub>2</sub>  |          | 1.35       | 163.0752, 135.0802, 117.0700, 91.0539, 79.0546, 55.0178                                                            | Unidentified                            |



**Table S2.** The high fat diet and AIN76A diet composition.

| Diet composition | High fat diet |        | AIN76A diet |        |
|------------------|---------------|--------|-------------|--------|
|                  | % gram        | % kcal | % gram      | % kcal |
| Protein          | 14.3          | 13     | 20.3        | 20.8   |
| Carbohydrate     | 52.4          | 47.6   | 66          | 67.7   |
| Fat              | 19.3          | 39.4   | 5           | 11.5   |
| Total            |               | 100    |             | 100    |

## SI2. Materials and Methods

Methanol and acetonitrile with high-performance liquid chromatography (HPLC)-grade were purchased from Merck Inc (Germany). Purified water was prepared from a Barnstead Genpure UV/VF (Thermo, USA).

Analyses were performed on an Agilent 1290 liquid chromatographic system (Agilent Technologies, USA) and an Agilent 6545 Quadrupole-Time of flight system (Agilent Technologies, USA), equipped with an electrospray ionization source operating in positive ion mode. The samples were separated on ACQUITY UPLC® BEH-C<sub>18</sub> column (2.1mm × 100mm , 1.7 µm , Waters, Ireland). The gradient mobile phase was a mixture of water (A) and acetonitrile (B). The flow rate of 0.3 mL/min at 35 °C was used in linear gradients as follows: 60-80% B (0-8 min), 80-95% B (8-9 min), 95% B (9-10 min). The injection volume was 5 µL.

The following MS parameters were employed: drying gas flow, 8 L/min; source drying gas temperature: 320 °C; nebulizer pressure: 35 psig; capillary voltage: 3.5 kV; Fragmentor: 120V. The MassHunter Qualitative Analysis (Version B.07.00, Agilent Technologies, Inc, USA) was employed for the analyses.

## References

- [1] Purup, S.; Larsen, E.; Christensen, L.P. Differential effects of falcarinol and related aliphatic C(17)-polyacetylenes on intestinal cell proliferation. *The Journal of Agricultural and Food Chemistry* **2009**, 57, 8290-8296, DOI: 10.1021/jf901503a.
- [2] Shao, L.; Nie, M.K.; Chen, M.Y.; Wang, J.; Wang, C.Z.; Huang, W.H.; Yuan, C.S.; Zhou, H.H. Screening and identifying antioxidants from *Oplopanax elatus* using 2,2'-diphenyl-1-picrylhydrazyl with off-line two-dimensional HPLC coupled with diode array detection and tandem time-of-flight mass spectrometry. *Journal of Separation Science* **2016**, 39, 4269-4280, DOI: 10.1002/jssc.201600838.
